# Supplementary material for: SRF promotes gastric cancer metastasis through stromal fibroblasts in an SDF1-CXCR4-dependent manner
Source: PubMed Central journal article supplement (PMC5216783; doi:10.18632/oncotarget.10024), 2016-06-14
Supplement: oncotarget-07-46088-s001.pdf [file oncotarget-07-46088-s001.pdf]

## SRF promotes gastric cancer metastasis through stromal fibroblasts in an SDF1-CXCR4-dependent manner

### SUPPLEMENTARY FIGURES AND TABLE

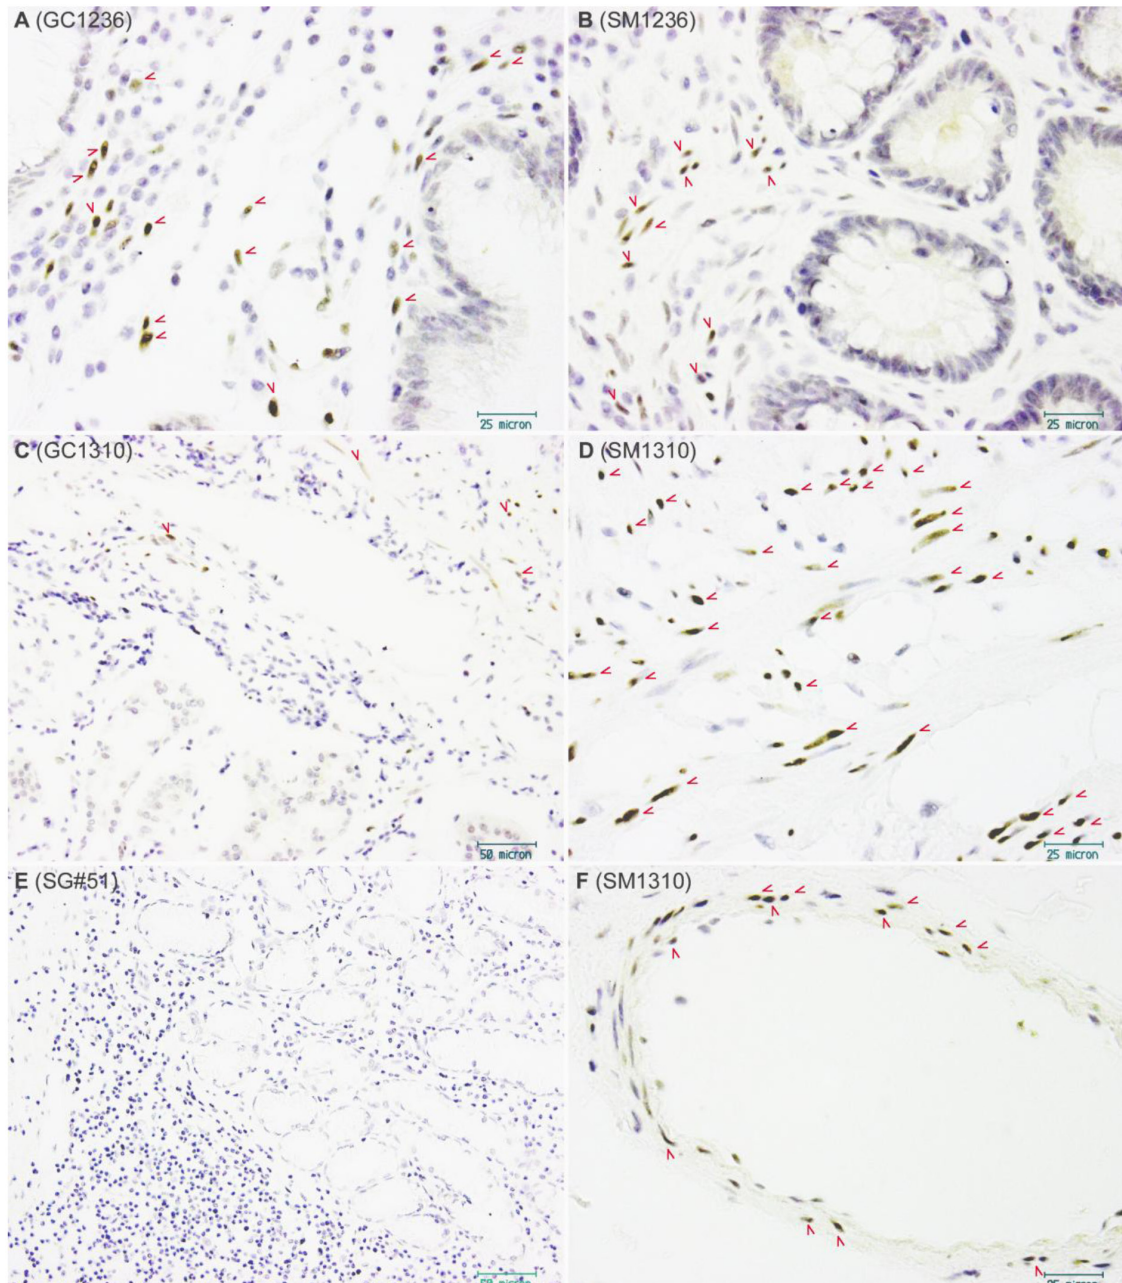

**Supplementary Figure S1: IHC Images showing SRF-staining in gastric tissues.** (A/C and B/D/F) Gastric carcinoma (GC) tissues and the corresponding surgical margin (SM) tissues, respectively. (E) A superficial gastritis lesion from a non-cancer subject. SRF staining (arrow) was observed in the fibroblasts and the smooth-muscle cells in the connective tissues A-D, and blood vessels F. Very weak cytoplasmic staining was observed in the epithelial cells B and C. SRF-stained cells were not observed in the mucosa or submucosa of the gastritis lesion E.

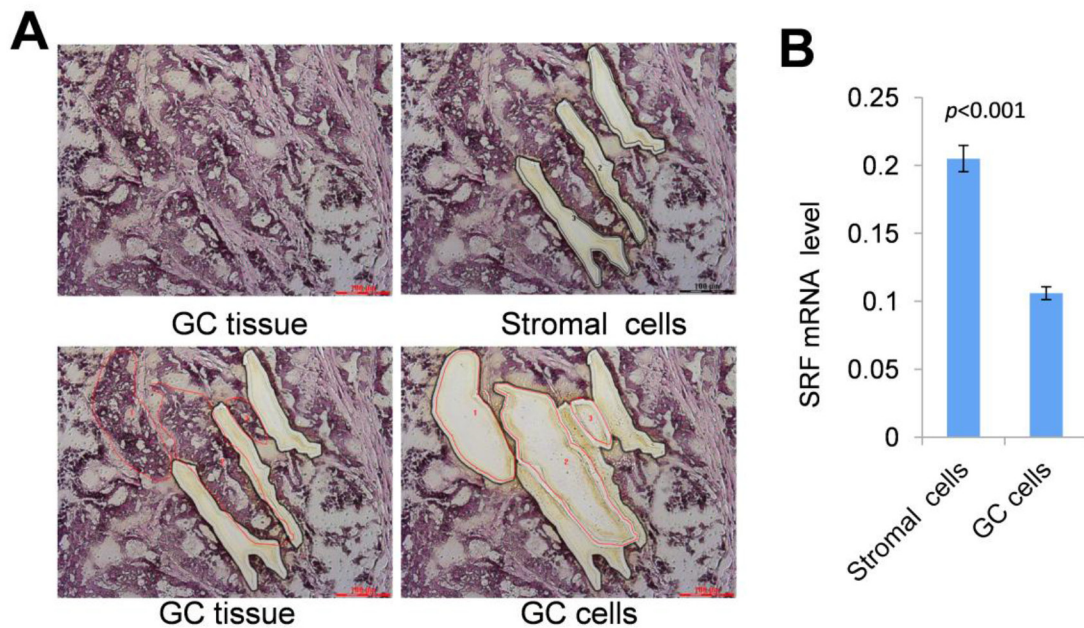

**Supplementary Figure S2: Comparison of the levels of *SRF* mRNA in the microdissected GC cells and the stromal cells.** **A.** Images of a representative gastric carcinoma (GC) tissue before and after three stromal and glandular epithelial cell regions were micro-dissected using laser capture microscope system. **B.** Quantitative RT-PCR analysis showed that the level of *SRF* mRNA in the microdissected stromal cells was two times of that in the dissected GC cells.

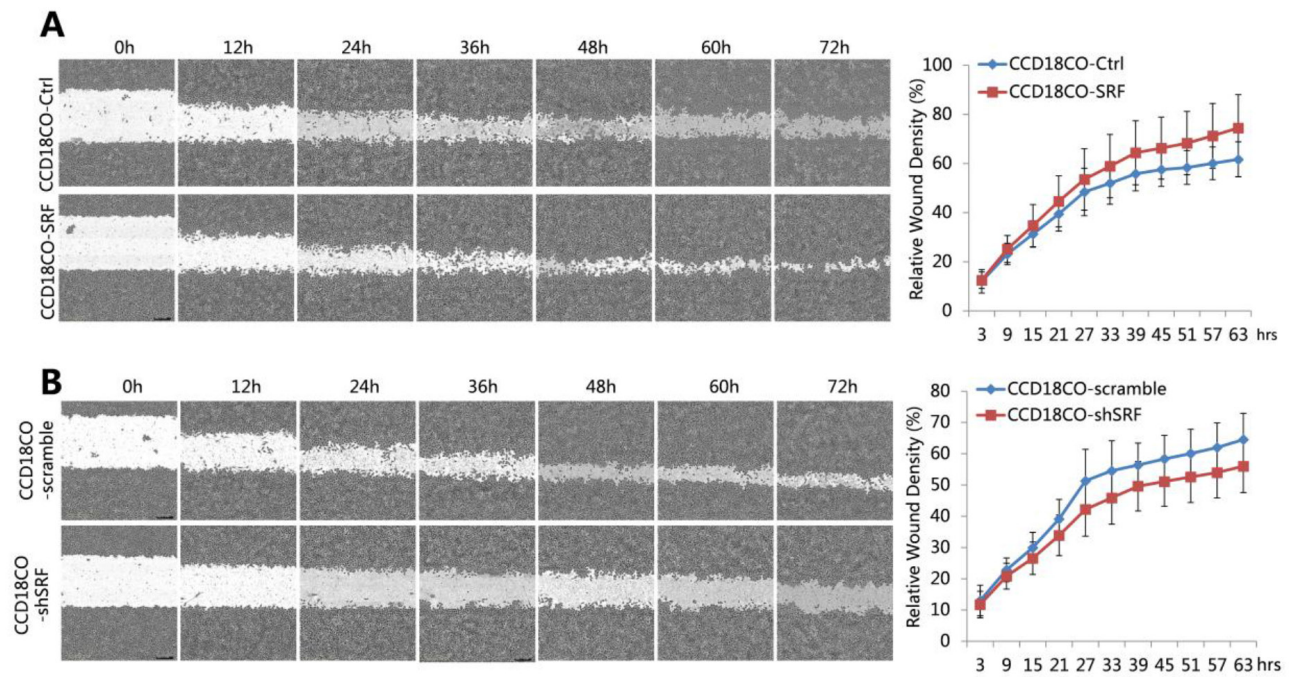

**Supplementary Figure S3: SRF in CCD18Co fibroblasts promoted the migration of cultured cancer cells *in vitro*.** A and B. The migration of MKN45 cells cultured with the conditioned medium with MEGS supplement, as determined using the wound-healing assay. The values from 6 wells were used to calculate the mean and SD at each time point for each treatment.

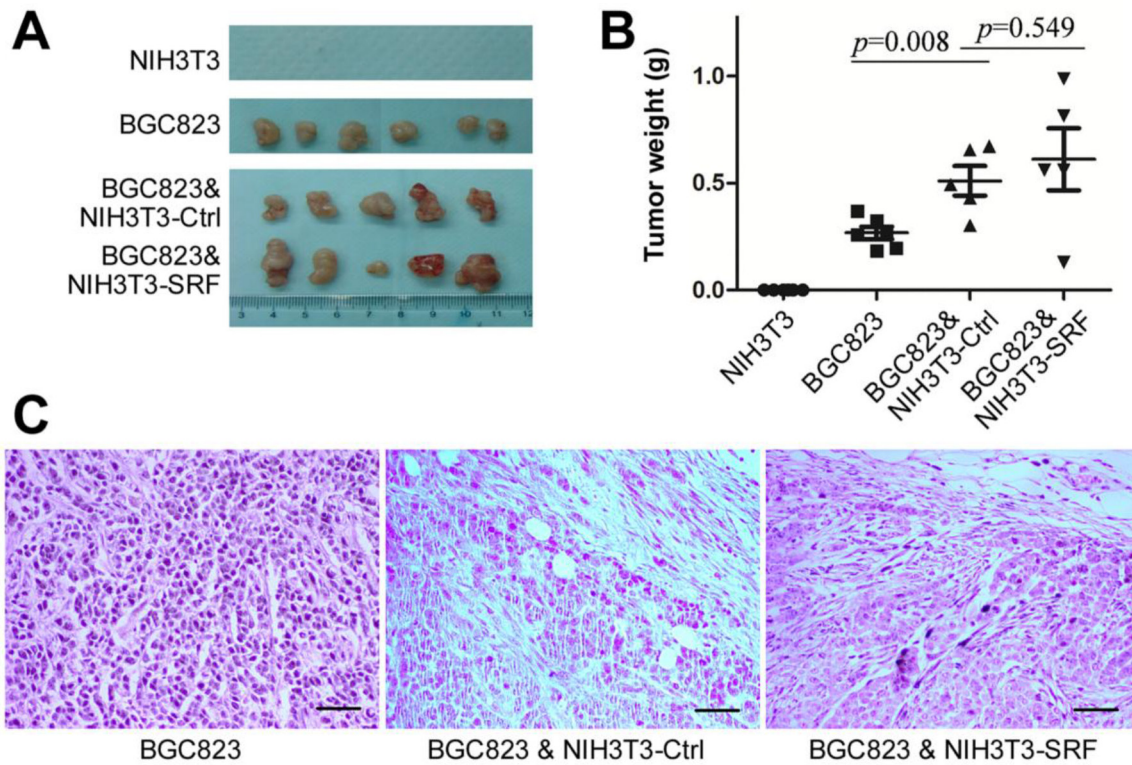

**Supplementary Figure S4: The tumor xenografts formed from the co-injection of BGC823 and SRF-overexpressing NIH3T3 cells.** The co-injected NIH3T3 cells were stably transfected with the mouse *SRF*-pTRIPZ expression vector. The mice were given distilled, sterile water containing 0.4 mg/mL doxycycline. **A.** The tumor xenografts on experimental day 12. **B.** The average tumor weight; the data represent the mean  $\pm$  SD. **C.** Hematoxylin and eosin (H&E)-stained tumor tissues; Black bar: 200  $\mu$ m.

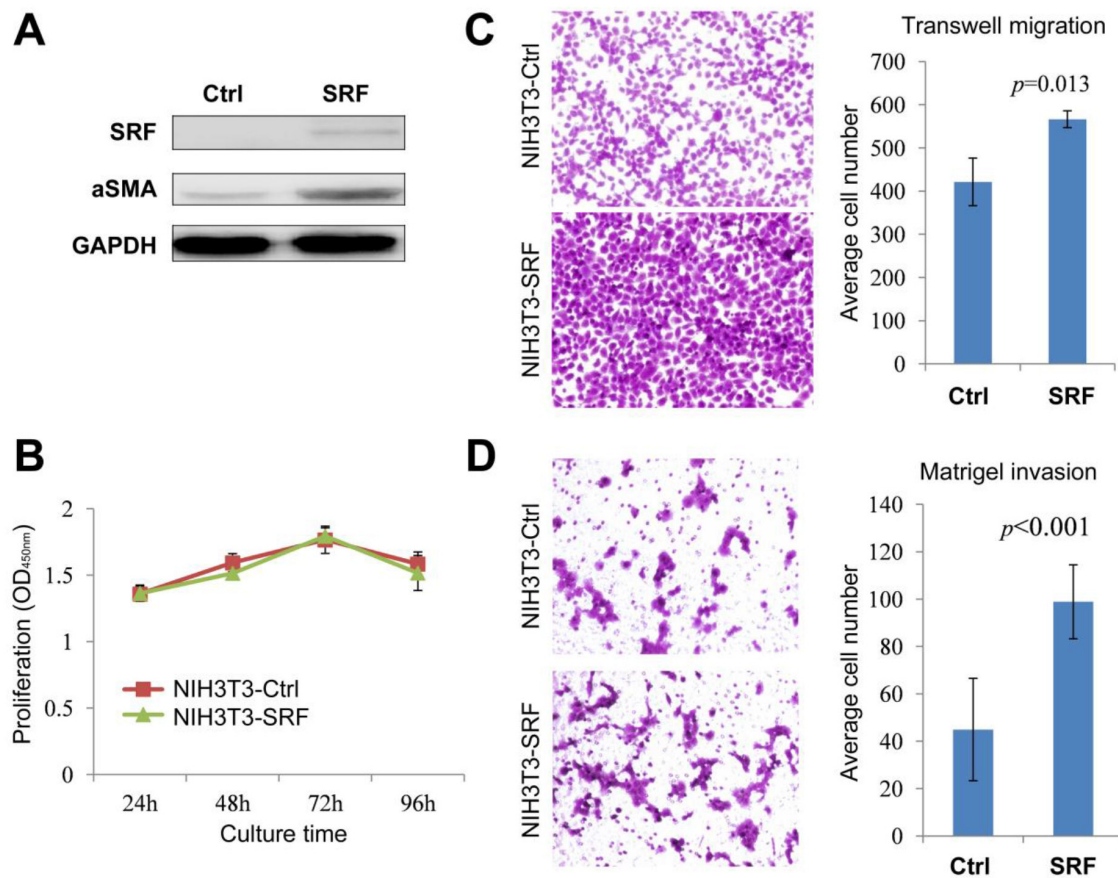

**Supplementary Figure S5: Effect of the conditioned medium from *SRF*-overexpressing NIH3T3 cells on the proliferation, migration, and invasion of BGC823 cells.** **A.** Western blot results showing *SRF* and  $\alpha$ SMA expression levels in NIH3T3 cells stably transfected with the mouse *SRF* expression vector. **B.** The proliferation curves of human gastric carcinoma BGC823 cells cultured with conditioned medium from NIH3T3 cells with or without *SRF* overexpression as determined by the CCK8 assay. **C** and **D.** The migration and invasion capacity of BGC823 cells cultured for 18 or 72 hrs with conditioned medium from NIH3T3 cells with or without *SRF* overexpression in the typical transwell migration and Matrigel assays, respectively.

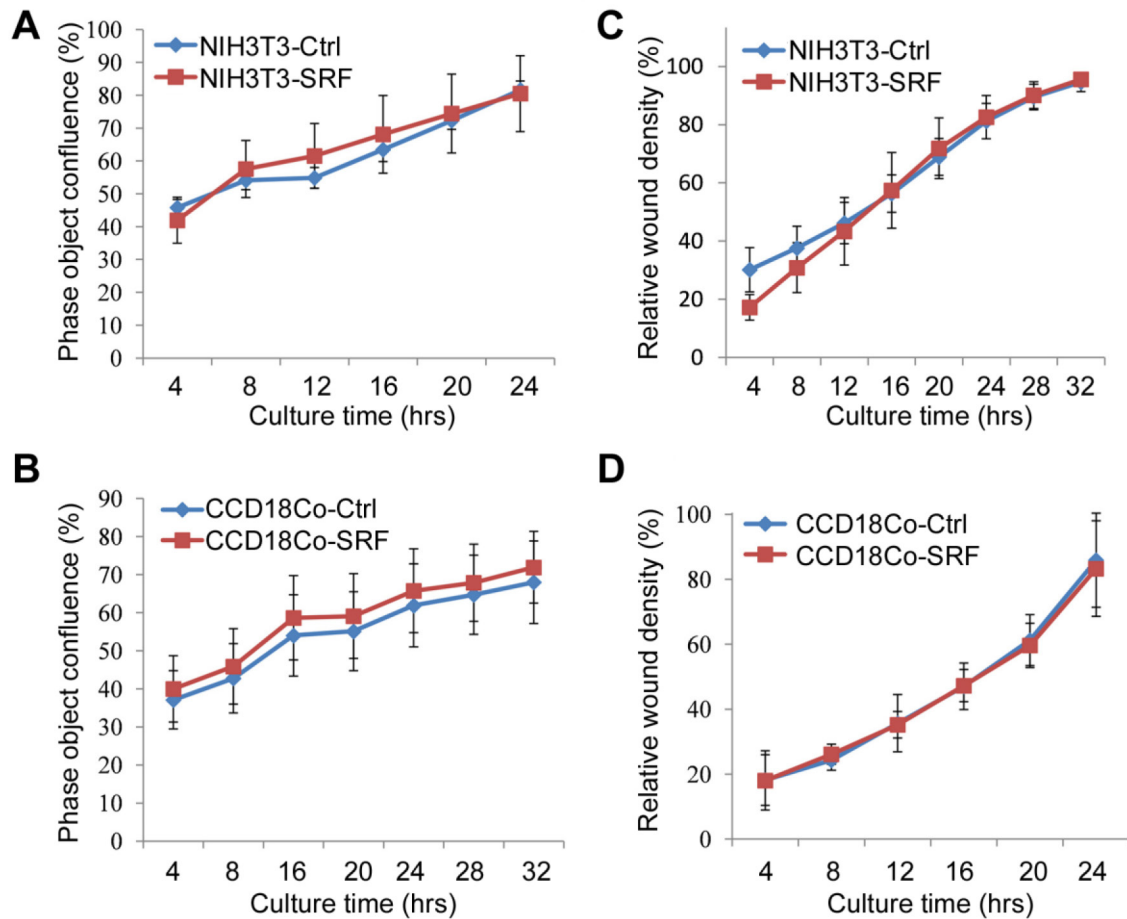

**Supplementary Figure S6: Effect of *SRF* overexpression on the proliferation and migration of fibroblasts. A and B.** The proliferation of NIH3T3 and CCD18Co cells stably transfected with the *SRF* expression or control vector as determined using the live content kinetic imaging system. **C and D.** The migration of NIH3T3 and CCD18Co cells stably transfected with the *SRF* expression or control vector.

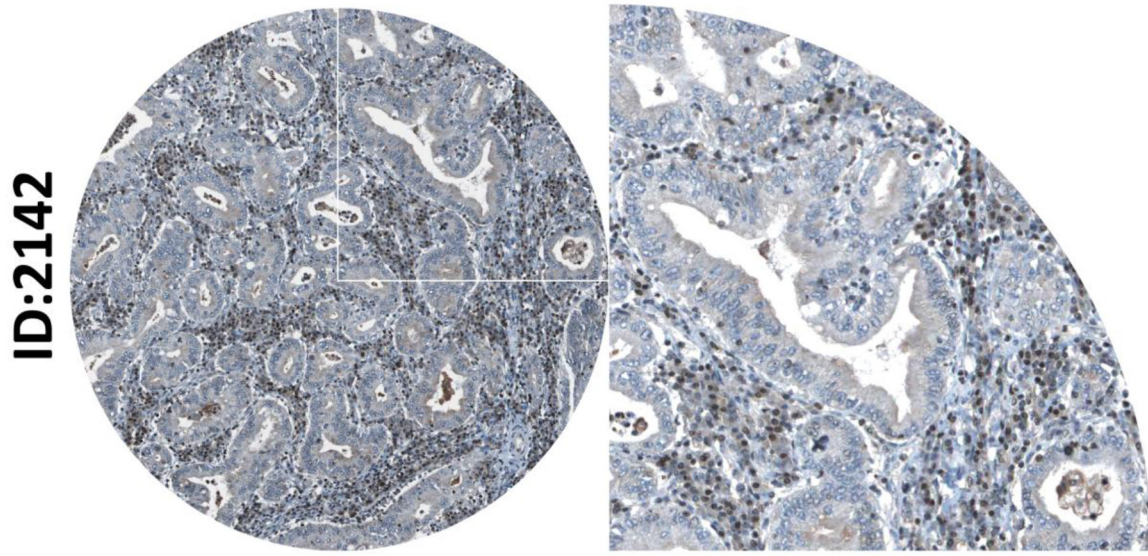

**ID:2142**

**Supplementary Figure S7: Images of SDF1 expressing cells in one representative GC (Patient ID:2142) in IHC analysis using SDF1-specific antibody CAB017564. Strong nucleus staining is observed in many stromal cells. These images are captured from original images downloaded from the web site [www.proteinatlas.org](http://www.proteinatlas.org) [27].**

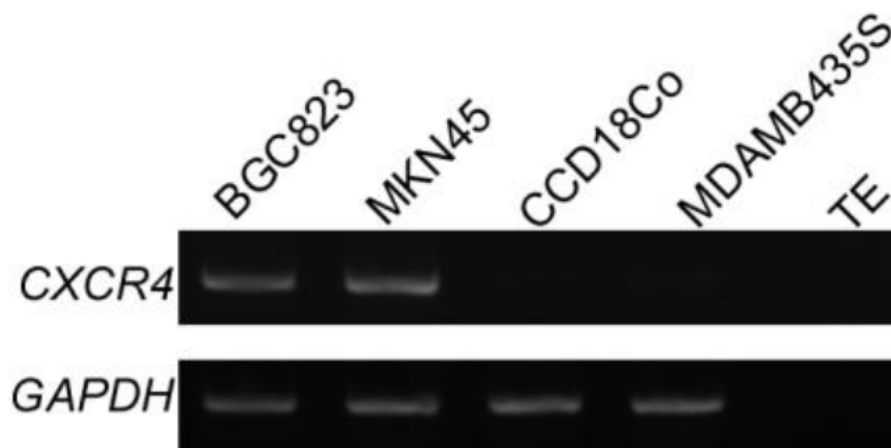

**Supplementary Figure S8: RT-PCR analysis showing the expression of the SDF1 receptor CXCR4 in CCD18Co, MKN45, and BGC823 cells. The cDNA sample from MDAMB435S cells is used as the CXCR4 negative control.**



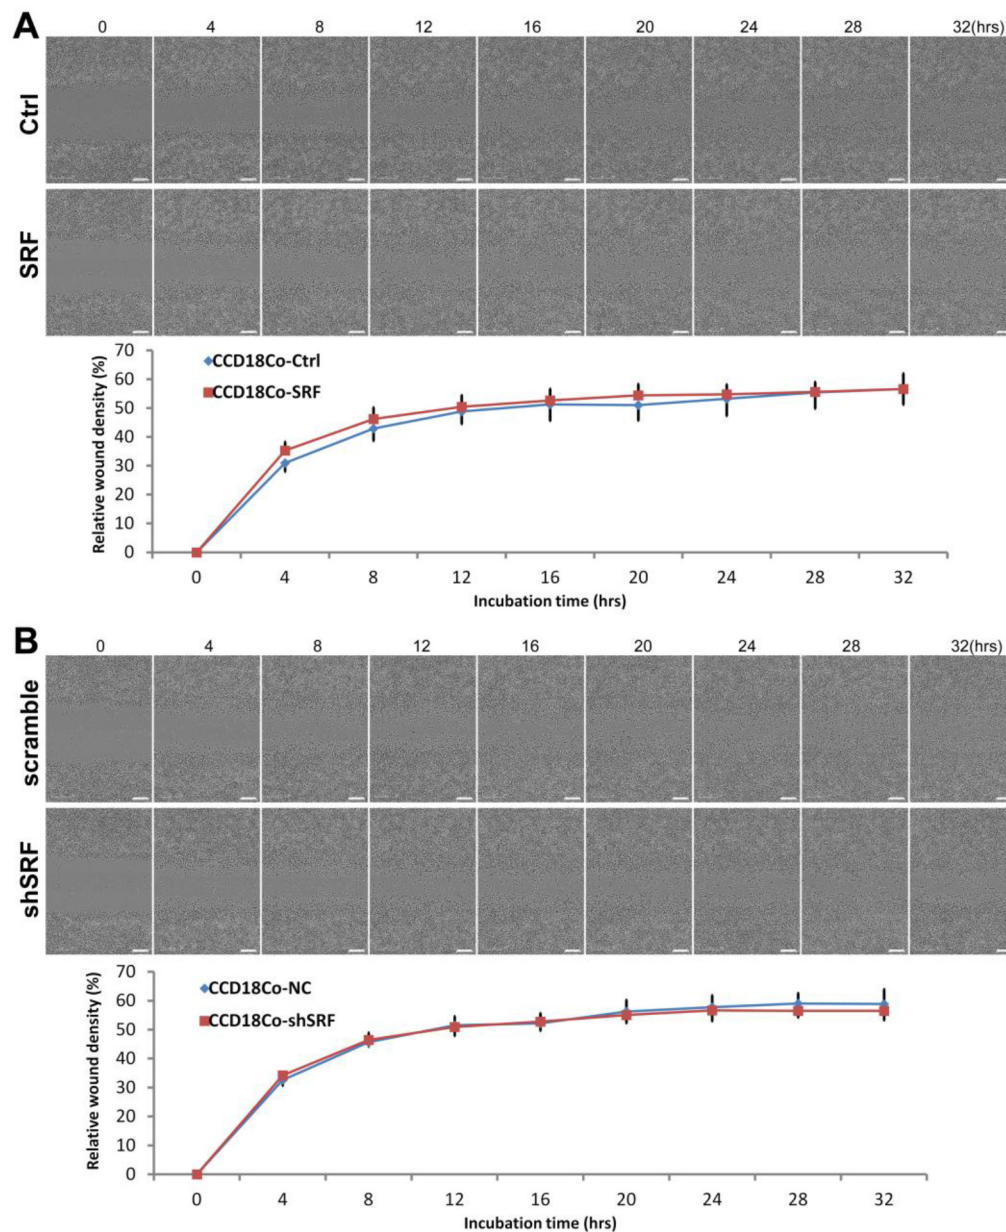

**Supplementary Figure S9: SRF in CCD18Co fibroblasts did not promote the migration of cultured MDA-MB-435S cancer cells without CXCR4 expression.** The relative wound density was recorded over time using the IncuCyte ZOOM™ live-cell imaging platform. **A.** The migration of MDA-MB-435S cells cultured with different conditioned medium from CCD18Co cells stably transfected with the *SRF* expression or control vector, as determined using the wound-healing assay. **B.** The migration of MDA-MB-435S cells cultured with different conditioned medium from CCD18Co cells stably transfected with the *SRF*-specific shRNA or scramble control vector.

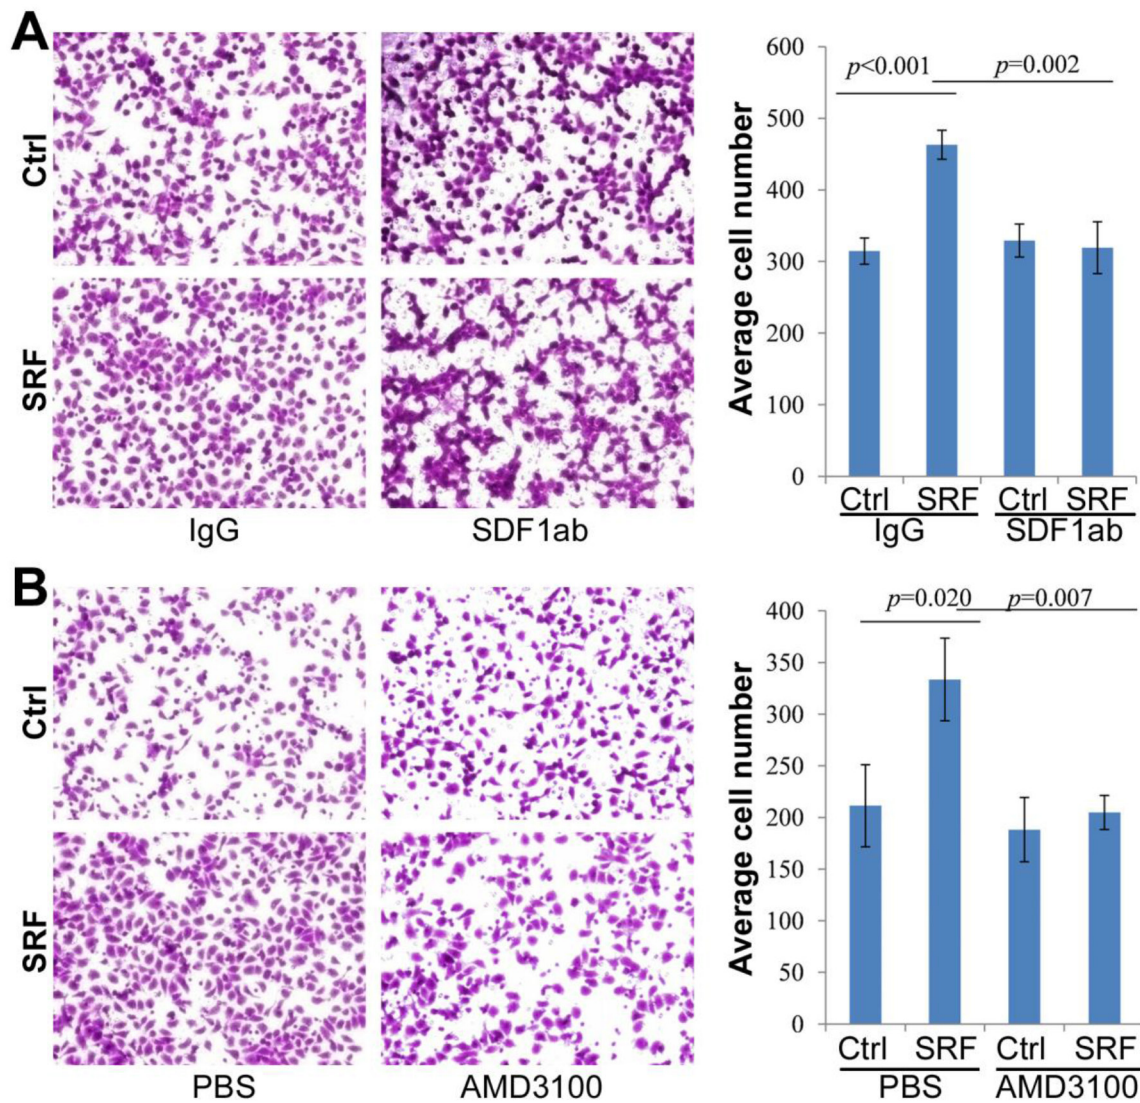

**Supplementary Figure S10: Anti-SDF1 neutralizing antibody and AMD3100 reversed the SRF-enhanced migration of BGC823 cells in a transwell assay.** A and B. The migration capacity of BGC823 cells cultured in conditioned medium from NIH3T3 cells transfected with the SRF or control vector and treated with anti-SDF1 antibody (SDF1ab) or AMD3100. The images are captured after 12 hrs of culture. The data represent the mean ± SD (n=3).

Supplementary Table S1: Oligo sequences of primers used in quantitative RT-PCR analysis

| Gene                 | Primer id                    | Oligo sequence (5'→3')                                 | Entrez gene | Product size | PCR Tm (°C) |
|----------------------|------------------------------|--------------------------------------------------------|-------------|--------------|-------------|
| <i>Srf</i> (mouse)   | qRT-msrf-F<br>qRT-msrf-R     | gcaccgtctgggaccgtgcagatcc<br>gtgctgtgggtggcatccaggttca | 20807       | 133bp        | 60          |
| <i>SRF</i> (human)   | qRT-hSRF-F<br>qRT-hSRF-R     | tgctgaatgccttctccca<br>gcctgctgccctatcaca              | 6722        | 166bp        | 56          |
| <i>SRF2</i> (human)  | nqRT-hSRF-F2<br>nqRT-hSRF-R  | gtggcgtcccccagggtgtt<br>gcctgctgccctatcaca             | 6722        | 100bp        | 58          |
| <i>αSma</i> (mouse)  | qRT-msma-F<br>qRT-msma-R     | gtgtgtgacaatggctctgg<br>tggatgatgatccatgttct           | 11468       | 208bp        | 58          |
| <i>αSMA</i> (human)  | qRT-hSMA-F<br>qRT-hSMA-R     | tgacaatggctctgggctctgtaa<br>ttcgtcaccacgtagctgtcttt    | 59          | 141bp        | 58          |
| <i>c-Fos</i> (mouse) | qRT-mcfos-F<br>qRT-mcfos-R   | cctgccccttctcaacgac<br>gctccacgttgctgatgct             | 14281       | 71bp         | 60          |
| <i>c-FOS</i> (human) | qRT-hcfos-F<br>qRT-hcfos-R   | actaccactcaccgcagac<br>gtgggaatgaagtggcact             | 2353        | 104bp        | 57          |
| <i>Sdf1</i> (mouse)  | qRT-msdf-F<br>qRT-msdf-R     | gagagccacatcgccagagc<br>ggatccactttaatttcgggtcaa       | 20315       | 133bp        | 60          |
| <i>SDF1</i> (human)  | qRT-hSDF-F<br>qRT-hSDF-R     | gattgtagccccggctgaaga<br>ttcggtaaatgcacactgt           | 6387        | 46bp         | 60          |
| <i>Tgf-β</i> (mouse) | qRT-mtgfβ-F<br>qRT-mtgfβ-R   | ttgcttcagctccacagaga<br>tgggttagagggcaaggac            | 21803       | 183bp        | 56          |
| <i>TGF-β</i> (human) | qRT-hTGF-β-F<br>qRT-hTGF-β-R | actgcaagtggacatcaacg<br>tgccggaatcaatgtacagc           | 7040        | 218bp        | 56          |
| <i>CXCR4</i> (mouse) | qRT-mcxcr4-F<br>qRT-mcxcr4-R | gaccgcctttacccgatagc<br>acccccaaaaggatgaaggagtc        | 12767       | 248bp        | 60          |
| <i>CXCR4</i> (human) | qRT-hCXCR4-F<br>qRT-hCXCR4-R | aatcttctgccaccatct<br>gacccaacatagaccact               | 7852        | 367bp        | 58          |
| <i>Mmp2</i> (mouse)  | qRT-mmmp2-F<br>qRT-mmmp2-R   | catgtcgcccctaaaacaga<br>ccatcaaacgggtatccatc           | 17390       | 439bp        | 58          |
| <i>MMP2</i> (human)  | qRT-hMMP2-F<br>qRT-hMMP2-R   | cttctccctcgcaagcc<br>atggattcgagaaaaccg                | 4313        | 157bp        | 60          |
| <i>Gapdh</i> (mouse) | qRT-mgapdh-F<br>qRT-mgapdh-R | tggcaaatggagattgttggc<br>aagatggatgggcttccccg          | 14433       | 156bp        | 58          |
| <i>GAPDH</i> (human) | qRT-hGAPDH-F<br>qRT-hGAPDH-R | gagatggatgggatttc<br>gaaggtgaagtcggagt                 | 2597        | 224bp        | 58          |
| <i>Alu</i>           | qRT-Alu-F<br>qRT- Alu -R     | gaggctgaggcaggagaatcg<br>tgtcgcccaggctggagt            |             | 88bp         | 60          |
